# Supplementary material for: Comparative transcriptome analysis between an evolved abscisic acid-overproducing mutant Botrytis cinerea TBC-A and its ancestral strain Botrytis cinerea TBC-6
Source: PubMed Central journal article supplement — Sci Rep. 2016 Nov 28;6:37487. doi: 10.1038/srep37487 (PMC5124961; doi:10.1038/srep37487), 2016-11-28
Supplement: srep37487-s1.pdf [file srep37487-s1.pdf]

**Comparative transcriptome analysis between an evolved abscisic acid-overproducing mutant *Botrytis cinerea* TBC-A and its ancestral strain *Botrytis cinerea* TBC-6**

Zhongtao Ding<sup>1,2</sup>, Zhi Zhang<sup>1,2</sup>, Juan Zhong<sup>1</sup>, Di Luo<sup>1</sup>, Jinyan Zhou<sup>1</sup>, Jie Yang<sup>1</sup>, Liang Xiao<sup>1</sup>, Dan Shu<sup>1,\*</sup> & Hong Tan<sup>1,\*</sup>

1 Key Laboratory of Environmental and Applied Microbiology, Chengdu Institute of Biology, the Chinese Academy of Sciences, Chengdu 610041, PR. China.

2 University of the Chinese Academy of Sciences, Beijing 100049, PR. China.

\*Corresponding authors: D. Shu (email: whosecats@163.com) and H. Tan (email: abath@cib.ac.cn)

## Supplementary information

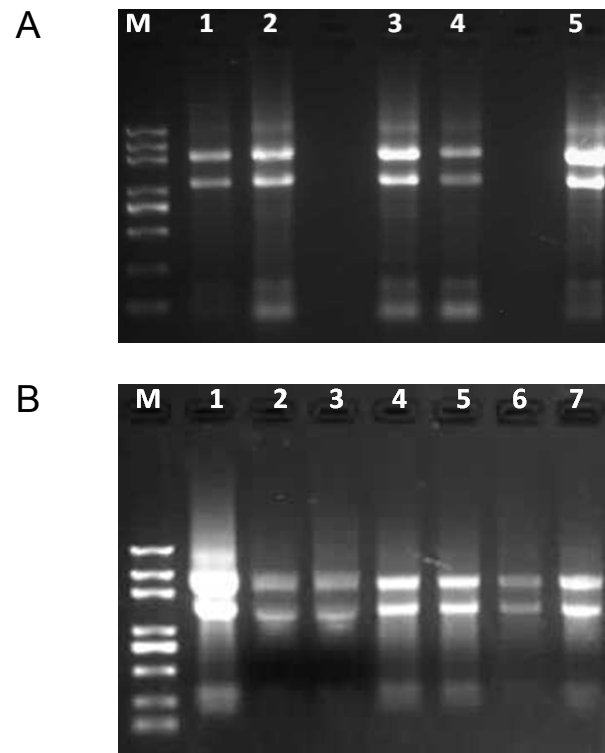

**Figure S1.** Electrophoresis images of the *Botrytis cinerea* TBC-A and TBC-6 RNA samples subjected to transcriptome sequencing. **(A)** Electrophoresis image of the 5 *Botrytis cinerea* TBC-6 RNA samples used for RNA sequencing. M: Marker; Lane 1: TBC-6-17 h total RNA sample; Lane 2: TBC-6-41 h total RNA sample; Lane 3: TBC-6-72 h total RNA sample; Lane 4: TBC-6-96 h total RNA sample; Lane 5: TBC-6-120 h total RNA sample. **(B)** Electrophoresis image of the 7 *Botrytis cinerea* TBC-A RNA samples used for RNA sequencing. M: Marker; Lane 1: TBC-A-17 h total RNA sample; Lane 2: TBC-A-41 h total RNA sample; Lane 3: TBC-A-48 h total RNA sample; Lane 4: TBC-A-52 h total RNA sample; Lane 5: TBC-A-72 h total RNA sample; Lane 6: TBC-A-96 h total RNA sample; Lane 7: TBC-A-120 h total RNA sample.

**Table S1.** Summary of the RNA-seq data, quality control and mapping to TBC-A genome sequence.

| Sample name | Raw reads | Average length | Total clean reads | Uniquely mapped reads to TBC-A genome sequence | Q20         | Q30       |
|-------------|-----------|----------------|-------------------|------------------------------------------------|-------------|-----------|
| TBC-6-17h   | 24000000  | 2*100          | 23630320          | 14452630 (61.16%)                              | 0.988587095 | 0.9361843 |
| TBC-6-41h   | 24000000  | 2*100          | 23475792          | 15024842 (64.00%)                              | 0.997205152 | 0.9830862 |
| TBC-6-72h   | 24000000  | 2*100          | 23363414          | 14453926 (61.87%)                              | 0.991609146 | 0.9534694 |
| TBC-6-96h   | 24000000  | 2*100          | 23391082          | 14764162 (63.12%)                              | 0.991628653 | 0.9536873 |
| TBC-6-120h  | 24000000  | 2*100          | 23357358          | 14797260 (63.35%)                              | 0.991563893 | 0.9533049 |
| TBC-A-17h   | 24000000  | 2*100          | 23474688          | 15714974 (66.94%)                              | 0.991703904 | 0.9538087 |
| TBC-A-41h   | 24000000  | 2*100          | 23150542          | 14392496 (62.17%)                              | 0.985030105 | 0.924453  |
| TBC-A-48h   | 24000000  | 2*100          | 23138952          | 16924790 (73.14%)                              | 0.983330119 | 0.9161745 |
| TBC-A-52h   | 24000000  | 2*100          | 23141932          | 14885364 (64.32%)                              | 0.984177622 | 0.9205756 |
| TBC-A-72h   | 24000000  | 2*100          | 23225008          | 15037280 (64.75%)                              | 0.984892502 | 0.9234146 |
| TBC-A-96h   | 24000000  | 2*100          | 23161708          | 14473394 (62.49%)                              | 0.984537598 | 0.9220141 |
| TBC-A-120h  | 24000000  | 2*100          | 23166820          | 14680694 (63.37%)                              | 0.984639111 | 0.9228005 |

**Table S8.** The primers used in this study for quantitative real-time PCR analysis.

| Primer name     | 5'-3' DNA sequence        |
|-----------------|---------------------------|
| RT-PDC-F        | AGACGCTGGAAGTGACAGTAGAAC  |
| RT-PDC-R        | CCAAGGCGGATCATTGTGCTTAC   |
| RT-ALDH-F       | ACCGTTGTTACTGGAGGTGAGAG   |
| RT-ALDH-R       | GGTGGAGAACTTGGCGATGGA     |
| RT-ACS-F        | CGCTCTCCGATCCAAGTGTAGTC   |
| RT-ACS-R        | CGCCAGTCCTCCAACATTGCTA    |
| RT-CRC-F        | GTTTCTTCTCCGCCATTCCACAAA  |
| RT-CRC-R        | TTCACCACATCGACACCACCATT   |
| RT-CAT-F        | GCCAGCAGTCGGAATCCTTACAT   |
| RT-CAT-R        | CGCCATCACCGTGCCAGTATT     |
| RT-YAT-F        | GCTCAACACAACCGTCCTCTCA    |
| RT-YAT-R        | TGTCTGGCGATGCTTACTACTGG   |
| RT-ACAT-F       | ACACGAGAACAACAAGACGAATACG |
| RT-ACAT-R       | CGAAGCATTGGCAGCGGTAAT     |
| RT-FPPS-F       | TTGACAGCACCAGAGGACAAGG    |
| RT-FPPS-R       | GGCGACAGGAAGGTAGAAGGAAT   |
| RT-BC1G_15246-F | CCATCGCAACAGTCGGTAAGGT    |
| RT-BC1G_15246-R | CCATCCGCATCATCCGTAATAATC  |
| RT-CS-F         | ACTTCGCCAACCAACTCGGATT    |
| RT-CS-R         | ACCAGCAGCAAGGGACAACATT    |
| RT-Amy3-F       | AAGCCAAGCACAACTACTCCTCTC  |
| RT-Amy3-R       | GTGTTGCGTATGTGGAATCGTCATT |
| RT-CelB-F       | CTAGTTCGGCGCAACCTCAA      |
| RT-CelB-R       | GTAGCAGGAGTGACAGCAGGATT   |
| RT-PYK-F        | CCACCGCAATGGATCACTTAGTTAC |
| RT-PYK-R        | CGACGATAGTTCTTGGTAGGCTTGA |
| RT-ICL-F        | ATGCCGAGAGCCGAACAAGAA     |
| RT-ICL-R        | CTTACCACATCCACACCGAGAT    |
| RT-MLS-F        | GCAGAAGTGAGTCGTTGCAATT    |
| RT-MLS-R        | ATCCGCCTGTTTCCTTGAGTAATCT |
| RT-ACAC-F       | CTGGTAAGGACGACGATGAAGGAT  |
| RT-ACAC-R       | CGGCAGGTGTGATGTTCTCAACT   |
| RT-HMGCR-F      | ACAGAGTCACATGGCACATAACAG  |
| RT-HMGCR-R      | GCTGGAGACAAGGCTGCTATAACC  |
| RT-HMGCS-F      | GCTCTACAACGACTATCTTGCCAAC |
| RT-HMGCS-R      | CTCAACAAACCAACCAATCCACCAT |
| RT-Rco-3-F      | GGTGGTGGTCTCTTCTTCTTCC    |
| RT-Rco-3-R      | TGTTGGCGATGATCTCAGTAAGTT  |
| RT-Bcaba1-F     | TTAATGGCGGTAGCAGAGCATCAT  |
| RT-Bcaba1-R     | GCACCAGTGTAGAGCGAATAGCA   |
| RT-Bcaba2-F     | AATTGTTCTCCAGGTGGCTCTG    |

|             |                           |
|-------------|---------------------------|
| RT-Bcaba2-R | CTAGGTCCAAGACTGAATGGCTGAG |
| RT-Bcaba3-F | CACTGCCAGCAACAACCTCCT     |
| RT-Bcaba3-R | CGCCTTGTCCGCCGTGATTA      |
| RT-Bcaba4-F | CACCAATGCTAAAGACTGCCGAAA  |
| RT-Bcaba4-R | TCTCCATCCGCCATCAATGCTAAT  |
| RT-tubA-F   | GCGTTCGTGCATTGGTATGT      |
| RT-tubA-R   | CACGGGCCTCAGAGAATTCA      |

---

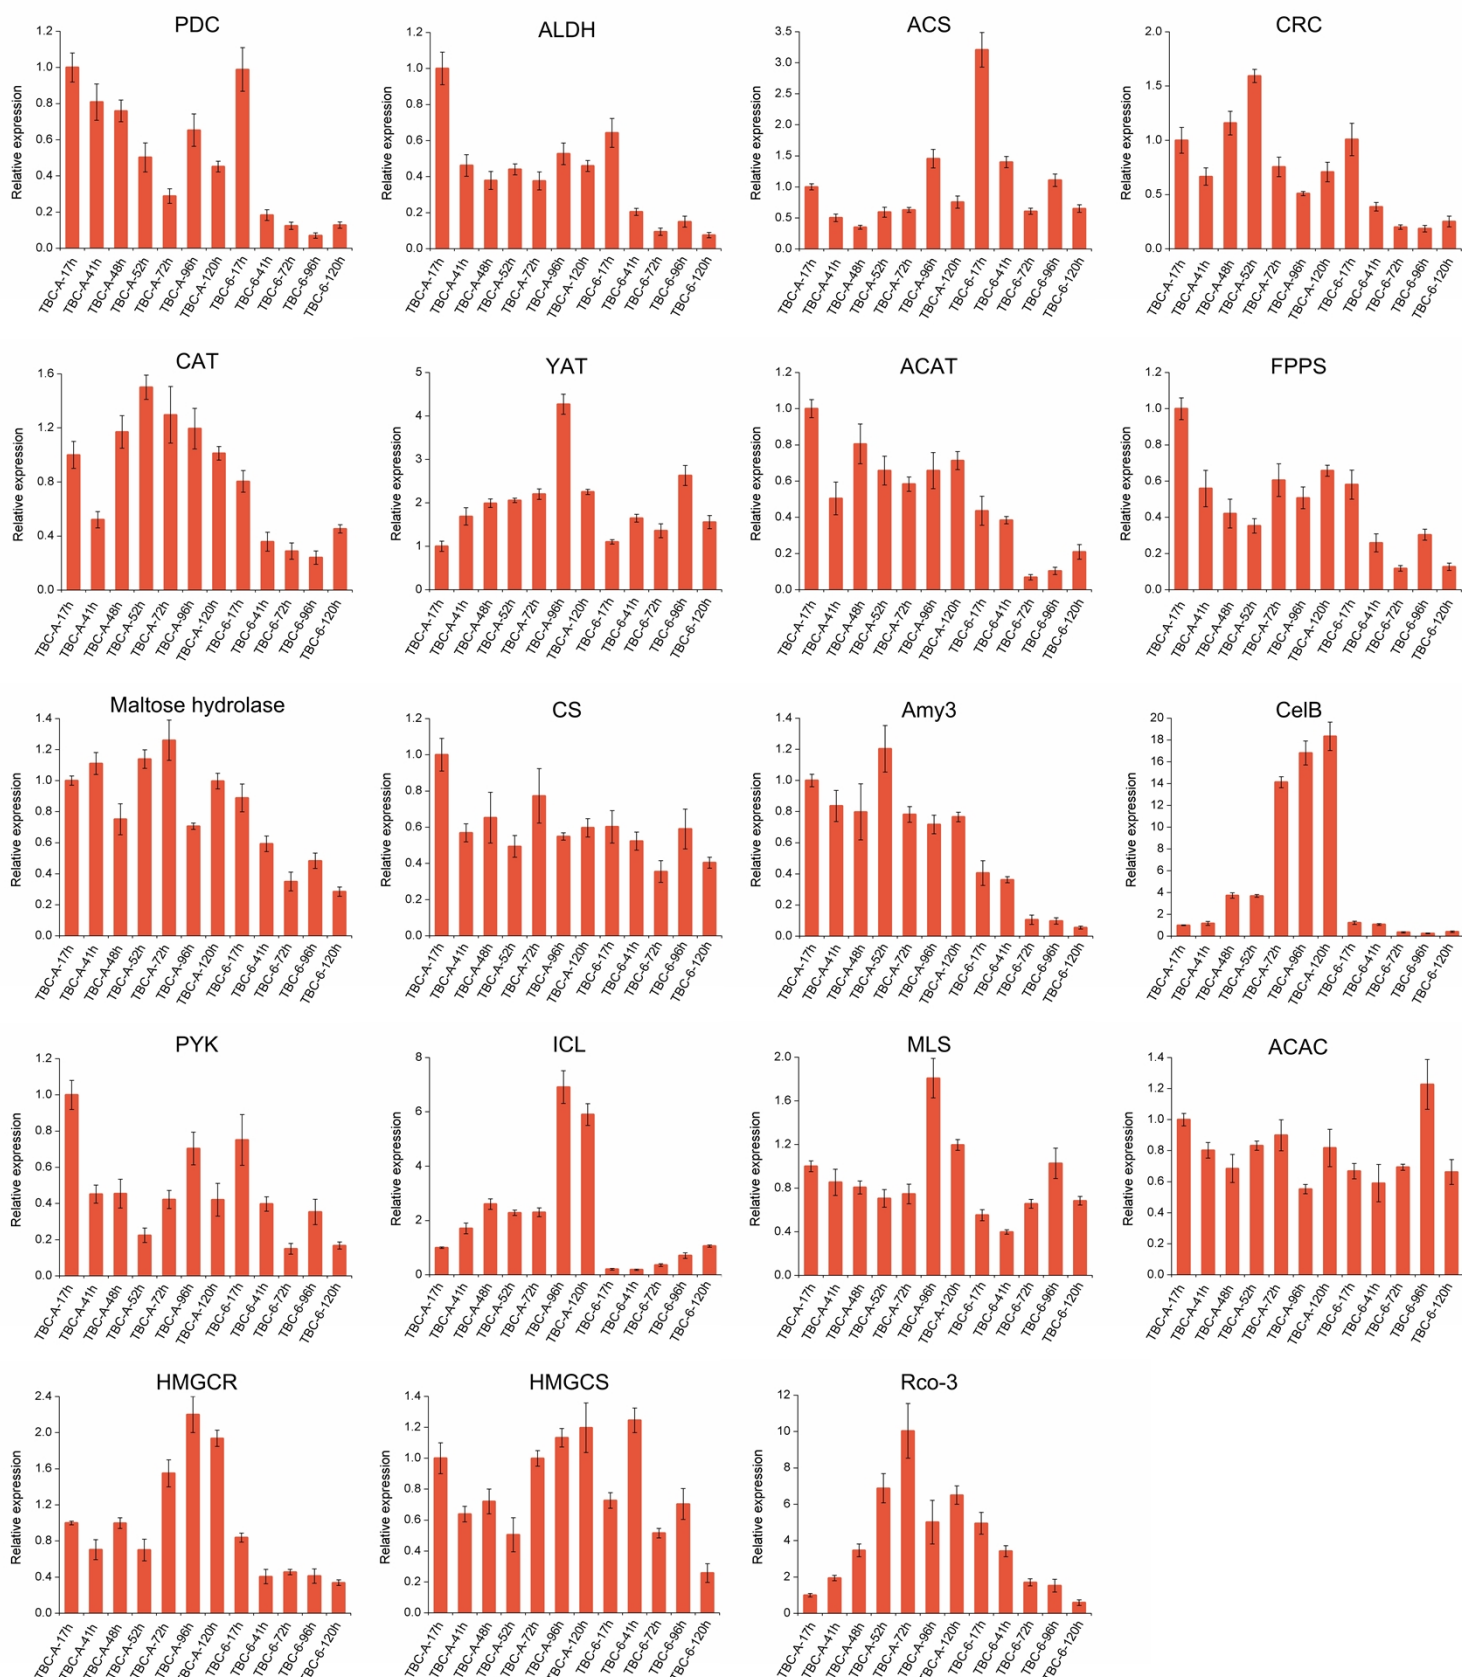

**Figure S2.** Validation of the RNA sequencing data using quantitative real-time PCR analysis. These selected DEGs encode PDC (pyruvate decarboxylase, encoded by BC1G\_11347), ALDH (aldehyde dehydrogenase,

encoded by BC1G\_06362), ACS (acetyl-coenzyme A synthetase, encoded by BC1G\_07090), CRC (mitochondrial carnitine carrier, encoded by BC1G\_14666), CAT (carnitine O-acetyltransferase, encoded by BC1G\_14516), YAT (putative mitochondrial carnitine O-acetyltransferase, encoded by BC1G\_02490), ACAT (acetyl-CoA acetyltransferase, encoded by BC1G\_02275), FPPS (farnesyl pyrophosphate synthase, encoded by BC1G\_02940), Maltose hydrolase (encoded by BC1G\_15246), CS (citrate synthase, encoded by BC1G\_02443), Amy3 (alpha-amylase A type-3, encoded by BC1G\_06463), CelB (endoglucanase B, encoded by BC1G\_07822), PYK (pyruvate kinase, encoded by BC1G\_05305), ICL (isocitrate lyase, encoded by BC1G\_13616), MLS (malate synthase, encoded by BC1G\_09443), ACAC (acetyl-CoA carboxylase, encoded by BC1G\_11289), HMGCR (3-hydroxy-3-methylglutaryl-coenzyme A reductase, encoded by BC1G\_01518), HMGCS (hydroxymethylglutaryl -CoA synthase, encoded by BC1G\_09652), Rco-3 (probable glucose transporter rco-3, encoded by BC1G\_03115) and BcABA3 (*B.cinerea* ABA3 protein, encoded by BC1G\_07534). The *B. cinerea* tubulin gene (BC1G\_05600) was used as the internal control gene. Data represent mean  $\pm$  SD of three independent replicates.
